Classification: Biological Sciences

# **Microbial glycoside hydrolases as antibiofilm agents with cross-kingdom activity**

**Brendan D. Snarr<sup>a\*</sup>, Perrin Baker<sup>b\*</sup>, Natalie C. Bamford<sup>b,c\*</sup>, Yukiko Sato<sup>a</sup>, Hong Liu<sup>d</sup>, Melanie Lehoux<sup>a</sup>, Fabrice N. Gravelat<sup>a</sup>, Hanna Ostapska<sup>a</sup>, Shane R. Baistrocchi<sup>a</sup>, Robert P. Cerone<sup>a</sup>, Elan E. Filler<sup>d</sup>, Matthew R. Parsek<sup>e</sup>, Scott G. Filler<sup>d,f</sup>, P. Lynne Howell<sup>b,c‡</sup>, and Donald C. Sheppard<sup>a‡</sup>**

<sup>a</sup>Departments of Medicine, Microbiology and Immunology; Infectious Diseases in Global Health Program, Centre for Translational Biology, McGill University Health Centre. Montréal, Québec, H4A 3J1, Canada

<sup>b</sup>Program in Molecular Structure & Function, Research Institute, The Hospital for Sick Children, Toronto, Ontario, M5G 1X8, Canada

<sup>c</sup>Department of Biochemistry, University of Toronto, Toronto, Ontario, M5S 1A8, Canada

<sup>d</sup>Los Angeles Biomedical Research Institute at Harbor-UCLA Medical Center, Torrance, CA, USA

<sup>e</sup>Department of Microbiology, University of Washington, Seattle, Washington, USA

<sup>f</sup>David Geffen School of Medicine at University of California, Los Angeles, CA, USA

\*These authors contributed equally to this work.

Running Title: Anti-biofilm enzymes with cross-kingdom activity

‡To whom correspondence should be addressed: Donald C. Sheppard, Tel.: 514-934-1934 ext 36104, E-mail: [don.sheppard@mcgill.ca](mailto:don.sheppard@mcgill.ca) or P. Lynne Howell, Tel.: 416-813-5378, E-mail: [howell@sickkids.ca](mailto:howell@sickkids.ca)

**Keywords:** Biofilm, Aspergillus, Pseudomonas, Therapeutics, Exopolysaccharide

## Abstract

Galactosaminogalactan and Pel are cationic heteropolysaccharides produced by the opportunistic pathogens, *Aspergillus fumigatus* and *Pseudomonas aeruginosa*, respectively. These exopolysaccharides both contain 1,4-linked *N*-acetyl-D-galactosamine and play an important role in biofilm formation by these organisms. Proteins containing glycoside hydrolase domains have recently been identified within the biosynthetic pathway of each exopolysaccharide. Recombinant hydrolase domains from these proteins (Sph3<sub>h</sub> from *A. fumigatus* and PelA<sub>h</sub> from *P. aeruginosa*) were found to degrade their respective polysaccharides *in vitro*. We therefore hypothesized that these glycoside hydrolases could exhibit anti-biofilm activity, and further, given the chemical similarity between galactosaminogalactan and Pel, that they might display cross-species activity. Treatment of *A. fumigatus* with Sph3<sub>h</sub> disrupted *A. fumigatus* biofilms with an EC<sub>50</sub> of 0.4 nM. PelA<sub>h</sub> treatment also disrupted pre-formed *A. fumigatus* biofilms with EC<sub>50</sub> values similar to those obtained for Sph3<sub>h</sub>. In contrast, Sph3<sub>h</sub> was unable to disrupt *P. aeruginosa* Pel-based biofilms, despite being able to bind to the exopolysaccharide. Treatment of *A. fumigatus* hyphae with either Sph3<sub>h</sub> or PelA<sub>h</sub> significantly enhanced the activity of the antifungals posaconazole, amphotericin B and caspofungin, likely through increasing antifungal penetration of hyphae. Both enzymes were non-cytotoxic and protected A549 pulmonary epithelial cells from *A. fumigatus*-induced cell damage for up to 24 hours. Intratracheal administration of Sph3<sub>h</sub> was well tolerated, and reduced pulmonary fungal burden in a neutropenic mouse model of invasive aspergillosis. These findings suggest that glycoside hydrolases can exhibit activity against diverse microorganisms and may be useful as therapeutic agents by degrading biofilms and attenuating virulence.

## Significance

The production of biofilms is an important strategy used by both bacteria and fungi to colonize surfaces and to enhance resistance to killing by immune cells and antimicrobial agents. We demonstrate that glycoside hydrolases derived from the opportunistic fungus *Aspergillus fumigatus* and Gram-negative bacterium *Pseudomonas aeruginosa* can be exploited to disrupt pre-formed fungal biofilms and reduce virulence. Additionally, these glycoside hydrolases can be utilized to potentiate antifungal drugs by increasing their hyphal penetration, to protect human cells from fungal-induced injury and to attenuate virulence of *A. fumigatus* in a mouse model of invasive aspergillosis. The findings of this study identify recombinant microbial glycoside hydrolases as promising therapeutics with the potential for anti-biofilm activity against pathogens across different taxonomic kingdoms.

## /body

The mould *Aspergillus fumigatus* and the Gram-negative bacterium *Pseudomonas aeruginosa* are opportunistic pathogens that cause pulmonary infection in immunocompromised patients and individuals who suffer from chronic lung diseases such as cystic fibrosis and bronchiectasis. *A. fumigatus* is the second most common nosocomial fungal infection (1) and ~10% of all nosocomial bacterial infections are caused by *P. aeruginosa* (2). Mortality associated with *P. aeruginosa* infections is high (3), and has increased with the emergence of multi- and even pan-resistance to antibiotics

(3, 4). Similarly, invasive aspergillosis is associated with mortality rates of up to 50% (5), and increasing rates of antifungal resistance have been reported worldwide (6). These factors underscore the urgent need for new effective therapies for these infections.

Although *A. fumigatus* and *P. aeruginosa* are members of different taxonomic kingdoms, both produce biofilms that constitute a protective lifestyle for the organism. Biofilms are complex communities of microorganisms that grow embedded in an extracellular matrix composed of DNA, protein, and exopolysaccharide (7). Biofilm formation provides a significant advantage to these organisms as the matrix mediates adherence to host cells (8, 9) and aids in the resistance to both antimicrobial agents (10, 11) and host immune defences (12, 13). *A. fumigatus* biofilm formation is dependent on the cationic polysaccharide galactosaminogalactan (GAG), a heteroglycan composed of  $\alpha$ 1,4-linked galactose and *N*-acetyl-D-galactosamine (GalNAc) that is partially deacetylated (14, 15). In comparison, *P. aeruginosa* has the genetic capacity to produce three biofilm exopolysaccharides; alginate, Psl and Pel (16). GAG shares several similarities with Pel, which has been identified as a cationic heteroglycan composed of 1,4-linked GalNAc and *N*-acetyl-D-glucosamine (GlcNAc) (17). Like GAG, the cationic nature of Pel results from partial deacetylation of the polymer (17). Most clinical and environmental isolates of *P. aeruginosa* utilize Pel and Psl during biofilm formation (18). Alginate is dispensable for biofilm formation and is only observed in chronic pulmonary infection when strains switch to a mucoid phenotype (18, 19).

Strains of *Aspergillus* and *P. aeruginosa* with impaired GAG, or Pel and Psl biosynthesis exhibit attenuated virulence (20, 21), suggesting that targeting these exopolysaccharides may be a useful therapeutic strategy. We previously demonstrated that recombinant glycoside hydrolases PelA<sub>h</sub> and PslG<sub>h</sub>, encoded in the *pel* and *psl* operons of *P. aeruginosa*, respectively, target and selectively hydrolyze the Pel and Psl exopolysaccharide components of the *Pseudomonas* biofilm matrix (22). Treatment with these enzymes rapidly disrupts established biofilms, increasing the susceptibility of *P. aeruginosa* to human neutrophil killing and potentiation of the antibiotic colistin (22).

Our recent work on *Aspergillus* has identified a cluster of five genes, which encode the proteins necessary for GAG biosynthesis (15). As with *P. aeruginosa*, we found that the product of one of these genes contains a glycoside hydrolase domain, Sph3<sub>h</sub>, that is capable of hydrolyzing purified and cell wall-associated GAG (23). In the present study we assessed the therapeutic potential of Sph3<sub>h</sub> in disrupting fungal biofilms. We establish that the exogenous addition of Sph3<sub>h</sub> is capable of rapidly disrupting existing biofilms of this organism at nanomolar concentrations. Additionally, we demonstrate cross-kingdom activity, as the *P. aeruginosa* glycoside hydrolase, PelA<sub>h</sub>, was able to disrupt *A. fumigatus* biofilms. While Sph3<sub>h</sub> was able to bind Pel, it was unable to disrupt pre-formed *P. aeruginosa* Pel-mediated biofilms. Treatment with Sph3<sub>h</sub> or PelA<sub>h</sub> increased the susceptibility of wild-type and azole-resistant *A. fumigatus* strains to lipophilic antifungal drugs. Kinetic studies with labelled posaconazole indicate that the increased susceptibility to antifungals is due to increased penetration of fungal cells by these agents. Both Sph3<sub>h</sub> and PelA<sub>h</sub> were non-toxic to mammalian cells and protected epithelial cells from *A. fumigatus*-induced damage for up to 24 hours. Intratracheal delivery of Sph3<sub>h</sub> was well tolerated by mice and significantly reduced the fungal burden of immunocompromised mice infected with *A. fumigatus*. Our results suggest that

glycoside hydrolases have the potential to be effective anti-biofilm therapeutics that can mediate activity against evolutionarily diverse microorganisms.

## Results

**Sph3<sub>h</sub> disrupts preformed *A. fumigatus* biofilms.** Our previous work demonstrated that Sph3<sub>h</sub> from *A. fumigatus* and *Aspergillus clavatus* can hydrolyze both purified and cell wall-bound GAG on young hyphae (23). We therefore sought to determine if the degradation of GAG by Sph3<sub>h</sub> could disrupt established *A. fumigatus* biofilms. Treatment with Sph3<sub>h</sub> for one hour disrupted established *A. fumigatus* biofilms with an effective concentration for 50% activity (EC<sub>50</sub>) of  $0.45 \pm 1.31$  nM (**Fig. 1a**). Biofilm disruption was associated with a marked reduction in hyphae-associated GAG as detected by lectin staining (**Fig. 1b and c**) and scanning electron microscopy (**Fig. 1d**). A catalytic variant Sph3<sub>h</sub> D166A, which does not mediate GAG hydrolysis (23), displayed a greater than 500-fold reduction in anti-biofilm activity (**Fig. 1a**) and failed to mediate degradation of biofilm-associated GAG (**Fig. 1b and c**). Collectively, these data suggest that biofilm disruption is mediated through the enzymatic hydrolysis of GAG.

To validate that fungal biofilm disruption by Sph3<sub>h</sub> is not restricted to the *A. fumigatus* laboratory strain Af293, the activity of Sph3<sub>h</sub> was evaluated against four clinical *A. fumigatus* isolates. Sph3<sub>h</sub> disrupted biofilms of all isolates tested at EC<sub>50</sub> values < 0.15 nM (**Fig. S1**). These results confirm the role of GAG in biofilm formation and indicate that Sph3<sub>h</sub> exhibits anti-biofilm activity across a wide range of *A. fumigatus* strains.

**The bacterial hydrolase PelA<sub>h</sub> hydrolyses GAG and disrupts fungal biofilms.** Given that GAG and Pel are both cationic exopolysaccharides containing 1,4-linked GalNAc (14, 17), we hypothesized that PelA<sub>h</sub> might exhibit activity against GAG. Consistent with this hypothesis, an *in vitro* reducing sugar assay demonstrated that PelA<sub>h</sub> was capable of hydrolyzing purified GAG (**Fig. S2**). Furthermore, using the crystal violet biofilm assay, we found that PelA<sub>h</sub> disrupted *A. fumigatus* fungal biofilms with an EC<sub>50</sub> value of  $2.80 \pm 1.14$  nM (**Fig. 2a**). The treatment of *A. fumigatus* hyphae with PelA<sub>h</sub> also resulted in a reduction in the amount of cell wall-associated GAG (**Fig. 2b-d**) as was observed with Sph3<sub>h</sub> treatment. The PelA<sub>h</sub> catalytic variant, PelA<sub>h</sub> E218A, which is markedly impaired in Pel hydrolysis and is inactive against *P. aeruginosa* biofilms (22) did not significantly hydrolyze GAG at concentrations as high as 12 μM (**Fig. S2**). Consistent with this observation, PelA<sub>h</sub> E218A was also several hundred-fold less active against *A. fumigatus* biofilms and did not degrade hyphae-associated GAG (**Fig. 2b and c**). These results suggest that PelA<sub>h</sub> disrupts *A. fumigatus* biofilms through the hydrolysis of biofilm-associated GAG.

**Sph3<sub>h</sub> binds Pel but does not disrupt established *P. aeruginosa* biofilms.** Given that PelA<sub>h</sub> can hydrolyze GAG and disrupt GAG-mediated biofilms, we hypothesized that Sph3<sub>h</sub> may exhibit activity against Pel and Pel-mediated biofilms. The inability to purify sufficient quantities of Pel precluded us from utilizing it as a substrate. Therefore, to examine whether Sph3<sub>h</sub> was capable of hydrolyzing Pel, the enzyme was exogenously applied to biofilms produced by the Pel overproducing *P. aeruginosa* strain PAO1 Δ*wspF* Δ*psl* P<sub>BAD</sub>*pel*. Treatment of these established biofilms with Sph3<sub>h</sub> did not affect levels of



Pel within the biofilms as visualized by lectin staining (**Fig. 3a and b**), nor did it reduce biofilm biomass, even at concentrations exceeding 10  $\mu$ M (**Fig. 3c**).

Since Sph3<sub>h</sub> did not hydrolyze Pel within *P. aeruginosa* biofilms, we tested whether the enzyme was capable of recognizing and binding this polysaccharide. Using an ELISA-based binding assay we observed dose-dependent binding of Sph3<sub>h</sub> to culture supernatants from the Pel over-producing *P. aeruginosa* strain, but not from supernatants of the Pel-deficient strain PAO1  $\Delta wspF \Delta pel \Delta psl$  (**Fig. 3d**). These data suggest that the inability of Sph3<sub>h</sub> to disrupt Pel-mediated biofilms is likely a consequence of an inability to hydrolyze Pel rather than being unable to bind the polysaccharide. Dose-dependent binding of the inactive Sph3<sub>h</sub> D166A variant to GAG-containing culture supernatants was also observed (**Fig. S3**), suggesting that binding of hydrolases to exopolysaccharides is insufficient to disrupt established biofilms in the absence of enzymatic cleavage of the polymer.

### **Sph3<sub>h</sub> and PelA<sub>h</sub> potentiate antifungals by enhancing their intracellular penetration.**

The Pel polysaccharide enhances resistance to several antibiotics including aminoglycosides and colistin (22, 24, 25). Since biofilm formation by *A. fumigatus* is associated with increased resistance to a number of antifungal agents (26-28), we hypothesized that GAG may have an analogous function to Pel in enhancing resistance to antifungal agents. To test this hypothesis, we investigated whether Sph3<sub>h</sub> or PelA<sub>h</sub> could potentiate the activity of commonly used antifungal drugs. Treatment of established fungal biofilms with either enzyme resulted in a significant reduction in the MIC<sub>50</sub> of the azole posaconazole, the polyene amphotericin B, and the echinocandin caspofungin (**Fig. 4a**). Sph3<sub>h</sub> or PelA<sub>h</sub> treatment produced a similar increase in sensitivity to posaconazole for both azole-sensitive and azole-resistant strains of *A. fumigatus* (**Fig. S4**). Susceptibility to voriconazole, a smaller and more polar azole, was unaffected by treatment with either glycoside hydrolase (**Fig. 4a**). Since both posaconazole and voriconazole have the same intracellular target, these findings suggest that cationic GAG mediates antifungal resistance by hindering cellular uptake of large, nonpolar molecules such as posaconazole. To investigate this hypothesis, the effect of Sph3<sub>h</sub> on intracellular penetration of posaconazole was examined using posaconazole conjugated to the fluorophore BODIPY (BDP-PCZ). Previous work has established that BDP-PCZ displays similar cellular and subcellular pharmacokinetics to unmodified posaconazole (29). Fluorometric studies revealed that Sph3<sub>h</sub>-treatment resulted in higher accumulation of BDP-PCZ within *A. fumigatus* hyphae (**Fig. 4b**). This finding indicates that GAG protects *A. fumigatus* from the action of lipophilic antifungals by limiting their penetration into hyphae.

### **Recombinant Sph3<sub>h</sub> and PelA<sub>h</sub> protect epithelial cells from damage by *A. fumigatus*.**

*A. fumigatus* GAG-mediated adherence is required for *A. fumigatus* to damage A549 pulmonary epithelial cells *in vitro* (20). We therefore tested whether treatment with either Sph3<sub>h</sub> or PelA<sub>h</sub> could protect epithelial cells from fungal-induced injury using an established chromium (<sup>51</sup>Cr) release damage assay (30). We first established that the enzymes were not cytotoxic and that the addition of Sph3<sub>h</sub> or PelA<sub>h</sub> to uninfected A549 cell monolayers did not cause detectable cellular damage (**Fig. S5a**), a finding verified with the IMR-90 human lung fibroblast cell line (**Fig. S5b**). These data are consistent

with the lack of cytotoxicity previously reported for PelA<sub>h</sub> (22). Next, we assessed whether Sph3<sub>h</sub> or PelA<sub>h</sub> were able to protect A549 cell monolayers from damage by *A. fumigatus*. Sph3<sub>h</sub> reduced epithelial cell injury by > 80% for 24 hours (**Fig. 5a**). Treatment with PelA<sub>h</sub> also protected epithelial cells from *A. fumigatus*-induced damage (**Fig. 5a**). The protective effect of PelA<sub>h</sub> was shorter than that observed with Sph3<sub>h</sub>, and was lost before 24 hours of treatment. The addition of protease inhibitors extended PelA<sub>h</sub>-mediated epithelial cell protection to 24 hours (**Fig. S5c**), suggesting that the decrease in PelA<sub>h</sub> mediated protection was likely due to proteolytic degradation of the recombinant protein. Epithelial cell protection was not observed with the catalytic variants, PelA<sub>h</sub> E218A or Sph3<sub>h</sub> D166A, suggesting that the hydrolytic activity of the enzymes is required for protection (**Fig 5a**).

**Intratracheal Sph3<sub>h</sub> is well tolerated, and attenuates fungal virulence in an immunocompromised mouse model of pulmonary aspergillosis.** Given the ability of Sph3<sub>h</sub> to protect epithelial cells for over 24 hours, this hydrolase was selected for evaluation *in vivo*. BALB/c mice treated intratracheally with doses up to 500 µg of Sph3<sub>h</sub> exhibited no signs of stress, weight loss or change in body temperature post-treatment (**Fig. S6a and b**). Additionally, no significant increase in pulmonary injury or inflammation between treated and untreated mice were observed as measured by bronchoalveolar lavage lactate dehydrogenase activity and total pulmonary leukocyte populations (**Fig. 5b and Fig. S6c**). Collectively these results suggest that a single intratracheal dose of Sph3<sub>h</sub> is well tolerated by mice.

To determine the ability of Sph3<sub>h</sub> to attenuate virulence of *A. fumigatus*, neutropenic BALB/c mice were infected intratracheally with *A. fumigatus* conidia with or without the co-administration of 500 µg of Sph3<sub>h</sub>. Four days after infection, mice infected with *A. fumigatus* and treated with Sph3<sub>h</sub> had a significantly lower pulmonary fungal burden to untreated, infected mice as measured by both fungal DNA (**Fig. 5c**) and pulmonary galactomannan content (**Fig. S7**). The fungal burden of the Sph3<sub>h</sub>-treated mice was similar to that observed with mice infected with the GAG-deficient hypovirulent strain *Δuge3* (20). Consistent with the fungal burden data, histopathologic examination of lung sections revealed the presence of fungal lesions in untreated, infected mice, but no detectable lesions in the lungs of infected mice treated with Sph3<sub>h</sub>, or those infected with conidia of the *Δuge3* mutant (**Fig. 5d**). These findings suggest that Sph3<sub>h</sub>-mediated degradation of GAG can limit the growth of *A. fumigatus in vivo*, to the same degree as is observed with GAG-deficient organisms.

## Discussion

In this study, we demonstrate that the fungal glycoside hydrolase Sph3<sub>h</sub> is able to degrade pre-formed *A. fumigatus* biofilms. This study is the first example of the use of a glycoside hydrolase to disrupt a fungal biofilm. Further, we establish that the glycoside hydrolase PelA<sub>h</sub> displays activity against biofilms formed by organisms across different microbial kingdoms. Both glycoside hydrolases potentiated the penetration and activity of antifungal agents *in vitro*, exhibited no toxicity against mammalian cells and protected epithelial cells from *A. fumigatus*-induced damage. Pulmonary administration of Sph3<sub>h</sub> was well tolerated and limited fungal growth in an immunocompromised mouse model,

suggesting that these enzymes are promising therapeutic agents for the treatment of fungal disease.

The mechanism by which the biofilm matrix enhances *A. fumigatus* resistance to antifungals is poorly understood. The effect of hydrolase treatment on the antifungal sensitivity of *A. fumigatus* provides some insight into this question and establishes a role for GAG in biofilm-associated antifungal resistance. Multiple observations suggest that GAG enhances antifungal resistance by acting as a barrier to antifungal penetration of hyphae. First, glycoside hydrolase degradation of GAG enhanced the activity of multiple antifungals with different mechanisms of action. Second, the activity of posaconazole, but not voriconazole, was enhanced even though both azoles target the same enzyme, CYP51A. These hydrolases also display similar activity against azole-resistant and azole-sensitive strains. The cationic nature of GAG may explain the differential effects on voriconazole as compared with other antifungals. The GAG barrier would be predicted to be most effective against large, lipophilic or cationic antimicrobial agents, and thus therapeutic hydrolases may be most effective as adjuvants for lipophilic antifungals. Previous studies have reported that the enzymatic degradation of neutral  $\alpha$ -glucans of *A. fumigatus* did not enhance susceptibility to antifungals (31), further supporting our hypothesis that exopolysaccharide charge plays a role in mediating antibiotic resistance. Similarly, hydrolysis of cationic Pel exopolysaccharide by PelA<sub>n</sub> enhances the activity of the polycationic antibacterial colistin (22). Interestingly, degradation of biofilm-associated extracellular DNA (eDNA) has previously been reported to enhance *A. fumigatus* susceptibility to caspofungin and amphotericin B, though the effects on posaconazole and voriconazole susceptibility were not reported in the study (26). Recent work has suggested that Pel anchors eDNA within *P. aeruginosa* biofilms through charge-charge interactions (17). Given the similarities between Pel and GAG, it is possible that GAG-mediated binding of eDNA may also contribute to enhancing antifungal resistance.

The results of these studies add to an emerging body of evidence that fungal biofilms share structural (32-35) and functional (26, 36, 37) similarity with those formed by pathogenic bacteria. The finding that glycoside hydrolases can display activity against the exopolysaccharides and biofilms of both fungi and bacteria provides the first evidence that these similarities could potentially be exploited for the development of therapeutics active against both organisms. Additionally, the similarity between the exopolysaccharides of *P. aeruginosa* and *A. fumigatus*, coupled with the interspecies activity of their glycoside hydrolases suggest the intriguing possibility that exopolysaccharide interactions may occur between organisms during multispecies biofilm formation. Co-colonization with *P. aeruginosa* and *A. fumigatus* is not uncommon in patients with chronic pulmonary disease such as cystic fibrosis (38). Although studies of the formation of mixed fungal-bacterial biofilms during pulmonary infection are limited, a recent study of patients with chronic lung disease reported that antibacterial therapy for *P. aeruginosa* was associated with a reduction in fungal colonization, suggesting the possibility of microbial cooperation (39). Further studies examining the role of cross-species exopolysaccharide and exopolysaccharide-modifying enzyme interactions are required to establish a role for cooperative biofilm interactions in pulmonary disease.

While PelA<sub>h</sub> exhibited cross-species activity and disrupted pre-formed fungal biofilms, Sph3<sub>h</sub> bound Pel, but was unable to disrupt established Pel-mediated biofilms. This difference in activity may reflect differences in the composition or conformation of each polysaccharide since GAG is a heteropolymer of GalNAc and galactose while Pel is comprised of GalNAc and GlcNAc. It is likely that these differences influence the ability of Sph3<sub>h</sub> and PelA<sub>h</sub> to hydrolyze the polymer. The inability of Sph3<sub>h</sub> to degrade pre-formed *P. aeruginosa* biofilms may suggest that mature Pel adopts a configuration or undergoes post-synthetic modification that renders it incompatible with the catalytic active site of Sph3<sub>h</sub> and resistant to cleavage. Detailed studies of these enzymes to determine the mechanisms underlying their differential activity against Pel will require purified polysaccharide, which is currently not available.

Both Sph3<sub>h</sub> and PelA<sub>h</sub> were found to be non-cytotoxic, and a single dose of intratracheal Sph3<sub>h</sub> was well tolerated by BALB/c mice. Co-administration of Sph3<sub>h</sub> with wild-type conidia to neutropenic mice greatly reduced fungal outgrowth within the lungs of these mice. Together these results provide proof-of-concept that the glycoside hydrolases can be used to improve the outcome of fungal infection, with minimal side effects and toxicity. These findings will pave the way for future work to evaluate the utility of these agents as antifungal therapeutics including detailed pharmacokinetic and toxicity studies, as well as the evaluation of these enzymes for the treatment of established fungal infections alone and in combination therapy with lipophilic antifungal agents such as posaconazole or amphotericin B.

## **Methods**

**Strains and culture conditions.** Strains used in this study are detailed in Table S1 and detailed culture conditions are described in the **Supplementary Information (SI)**.

**Recombinant hydrolase expression and purification.** Hydrolases were expressed and purified as described previously (22, 23).

**Treatment of *A. fumigatus* with glycoside hydrolases.** To visualize the effects of hydrolases on cell wall-associated GAG, hyphae were treated with recombinant hydrolases and stained with fluorescein-conjugated soybean agglutinin as previously described (23), with minor modifications. Hyphae were counterstained with a 1:1000 dilution of DRAQ5 (eBioscience) in phosphate buffered saline (PBS) for 5 min prior to paraformaldehyde (PFA) fixation. Complete image acquisition and processing methods can be found in the **SI**. To study the effects of hydrolases on biofilms, 10<sup>4</sup> conidia were grown in Brian media in polystyrene, 96-well plates for 19 h at 37 °C and 5% CO<sub>2</sub> and then treated with the indicated concentration of glycoside hydrolase in PBS for 1 h at room temperature. Biofilms were then gently washed, stained with 0.1% (w/v) crystal violet and de-stained with 100% ethanol for 10 min. The optical density of the de-stain fluid was measured at 600 nm (OD<sub>600</sub>).

**Scanning electron microscopy.** Conidia were grown for 9 h in Dulbecco's Modified Eagle's Medium (DMEM) at 37 °C, 5% CO<sub>2</sub> on glass coverslips, washed once with Ham's F- 12K (Kaighn's) Medium, and incubated with 500 µL in F-12K Medium with or without 0.5 µM hydrolase for 3 h at 37°C, 5% CO<sub>2</sub>. Coverslips were processed for scanning electron microscopy as previously described (20), and detailed in the **SI**.

**Treatment of *P. aeruginosa* with glycoside hydrolases.** For biofilm disruption, static *P. aeruginosa* cultures were grown for 22 h at 30 °C, at which point the planktonic cells



were aspirated and LB + 0.5% arabinose + 0.5  $\mu$ M glycoside hydrolase was added for an additional 3 h. For the detection of Pel, samples were incubated with 30  $\mu$ g/ml of fluorescein-conjugated *Wisteria floribunda* lectin for 2 h at 4 °C, fixed with 8% (w/v) PFA for 20 min at 4 °C and imaged as detailed in the SI. The ability of hydrolases to disrupt established biofilms were studied as previously described (22).

**Culture supernatant production.** *P. aeruginosa* cultures were grown at 30 °C for 24 h shaking at 200 rpm. Cultures were then centrifuged at 311  $\times$  g for 10 mins, and supernatants were filtered using 0.44  $\mu$ m syringe filters. Culture supernatants were stored at -20 °C until use.

**Hydrolase binding quantification.** Undiluted culture supernatants were incubated on Immunolon® 2HB high-binding 96 well microtiter plates overnight at 4 °C. Wells were washed 3X with Wash Buffer (PBS + 0.05% (v/v) Tween-20) and blocked for 30 min at 4 °C in Blocking Buffer (1% (w/v) Bovine Serum Albumin in Wash Buffer). Wells were washed 1X with Wash Buffer and incubated with the indicated concentrations of Sph3<sub>h</sub> diluted in Blocking Buffer for 3 h at 4 °C. Wells were washed 3X with Wash Buffer and incubated with polyclonal rabbit anti-Sph3<sub>h</sub> (custom-produced by Cedarlane Laboratories) diluted 1/100 in Blocking Buffer for 1.5 h at 4 °C. Wells were then washed 3X with Wash Buffer and incubated with donkey-anti-rabbit secondary antibody conjugated to horseradish peroxidase diluted 1/2000 in Blocking Buffer for 1 h at 4 °C. Wells were then washed 4X with Wash Buffer and incubated with TMB substrate (ThermoFisher®) for 15 mins at room temperature. The reaction was stopped with the addition of 2 N H<sub>2</sub>SO<sub>4</sub> and absorbance read at 450 nm with a 570 nm correction.

**Effects of glycoside hydrolases on antifungal susceptibility of *A. fumigatus*.** Fungal biofilms were prepared in tissue culture treated 24 well plates in RPMI 1640 medium (Life Technology) buffered with MOPS (3-(N-Morpholino) Propane-Sulfonic Acid) (Fisher) (RPMI-MOPS) for 9 h at 37 °C, 5% CO<sub>2</sub>. Serial dilutions of antifungal compounds with or without 0.5  $\mu$ M of Sph3<sub>h</sub> or PelA<sub>h</sub> were added to wells and the plates incubated at 37 °C and 5% CO<sub>2</sub> for 15 h. Fungal viability was measured using the sodium 3'-[1-[(phenylamino)-carbonyl]-3,4-tetrazolium]-bis(4-methoxy-6-nitro)benzene-sulfonic acid hydrate (XTT) metabolic assay as described previously (40). The concentration of antifungal resulting in a 50% decrease in viability (MIC<sub>50</sub>) was used as a measure of antifungal effect.

**Fluorometric quantification of hyphal uptake of BDP-PCZ.** 2.5 $\times$ 10<sup>4</sup> conidia of red fluorescent protein (RFP)-expressing *A. fumigatus* were grown in a 96-well black, clear-bottom plate for 8 h at 37 °C, 5% CO<sub>2</sub>. Hyphae were treated with 1  $\mu$ M of Sph3<sub>h</sub> in PBS for 90 min at 37 °C, 5% CO<sub>2</sub> then exposed to 2  $\mu$ g/mL BDP-PCZ for 10 mins. The plate was then read using an Infinite M1000 fluorescent plate reader with excitation wavelengths of 532 and 488 nm for RFP and BDP-PCZ, respectively. Background fluorescence was subtracted from both RFP and BDP-PCZ signals and the BDP-PCZ signal was then normalized to total RFP fluorescence for each well.

**Effects of glycoside hydrolases on *A. fumigatus*-induced epithelial cell damage.** A549 pulmonary epithelial cell damage by *A. fumigatus* was tested using the <sup>51</sup>Cr release assay as previously described (20, 30). Recombinant hydrolases were added to the A549 cultures at the time of infection at a final concentration of 0.5  $\mu$ M.

**Characterization of pulmonary damage by Sph3<sub>h</sub>.** All procedures involving mice were approved by the Animal Care Committees of the McGill University Health Centre.



Female BALB/c mice 5-6 weeks of age were anaesthetized with isoflurane and administered a single endotracheal injection of 500 µg Sph3<sub>h</sub> in 50 µL PBS and monitored daily for 7 days. Mice were then euthanized by CO<sub>2</sub> overdose and their airways lavaged with 1 mL PBS that was administered and collected through a needle inserted in the trachea. A total of 2 lavages were performed and pooled. The presence of LDH in the BAL fluid was used as an indicator of pulmonary damage; LDH activity was measured in the fluid using a commercial assay (Promega), as per manufacturer's instructions.

**Effects of Sph3<sub>h</sub> in a severely immunocompromised mouse model of invasive pulmonary aspergillosis.** Mice were immunosuppressed with cortisone acetate and cyclophosphamide as previously described (20, 41). Mice were infected with an endotracheal injection of 5x10<sup>3</sup> *A. fumigatus* conidia, resuspended in either PBS alone, or in combination with 500 µg of Sph3<sub>h</sub>. Mice were monitored daily and moribund animal were euthanized. At 4 days post infection mice were euthanized and their lungs were harvested. For fungal burden analysis, lungs were homogenized in 5 mL PBS containing protease inhibitor cocktail (Roche), and aliquots were stored at -80°C until use. Pulmonary fungal burden was determined as previously described (15), and detailed in the **SI**. For histological examination, lungs were inflated with 10% buffered formalin (Fisher Scientific) and immersed in formalin overnight to fix. Lungs were then embedded in paraffin and 4 µm thick sections were stained with periodic acid Schiff (PAS) stain.

**Acknowledgements:** Research described in this paper is supported by operating grants from the *Canadian Institutes of Health Research* (CIHR) (#81361 to P.L.H. and D.C.S.; #123306 to D.C.S.; and #43998 to P.L.H) and Cystic Fibrosis Canada (CFC) (to D.C.S. and P.L.H). B.D.S has been supported by graduate scholarships from CFC and CIHR. N.C.B has been supported in part by graduate scholarships from the *Natural Sciences and Engineering Research Council of Canada*, Mary H. Beatty, and Dr. James A. and Connie P. Dickson Scholarships from the University of Toronto, CFC, and The Hospital for Sick Children. P.B. has been supported in part by a CFC postdoctoral fellowship and a Banting Fellowship from CIHR. P.L.H. is the recipient of a Canada Research Chair. D.C.S is supported by a Chercheur-Boursier Award from the *Fonds de Recherche Quebec Santé*.

## References:

1. Bajwa SJ, Kulshrestha A (2013) Fungal infections in intensive care unit: Challenges in diagnosis and management. *Ann Med Health Sci Res* 3(2):238.
2. Peleg AY, Hooper DC (2010) Hospital-acquired infections due to gram-negative bacteria. *N Engl J Med* 362(19):1804–1813.
3. Vincent JL, et al. (1995) The prevalence of nosocomial infection in intensive care units in Europe. Results of the European Prevalence of Infection in Intensive Care (EPIC) Study. EPIC International Advisory Committee. *JAMA* 274(8):639–644.
4. Maltezou HC (2009) Metallo-β-lactamases in Gram-negative bacteria: introducing the era of pan-resistance? *International Journal of Antimicrobial Agents* 33(5):405.e1–405.e7.

- 440 5. Brown GD, et al. (2012) Hidden killers: human fungal infections. *Science*  
441 *Translational Medicine* 4(165):165rv13.
- 442 6. Verweij PE, et al. (2015) International expert opinion on the management of  
443 infection caused by azole-resistant *Aspergillus fumigatus*. *Drug Resist Updat* 21-  
444 22:30–40.
- 445 7. Mann EE, Wozniak DJ (2012) *Pseudomonas* biofilm matrix composition and niche  
446 biology. *FEMS Microbiology Reviews* 36(4):893–916.
- 447 8. Gravelat FN, et al. (2010) *Aspergillus fumigatus* MedA governs adherence, host  
448 cell interactions and virulence. *Cellular Microbiology* 12(4):473–488.
- 449 9. Sheppard DC (2011) Molecular mechanism of *Aspergillus fumigatus* adherence to  
450 host constituents. *Current Opinion in Microbiology* 14(4):375–379.
- 451 10. Høiby N, Bjarnsholt T, Givskov M, Molin S, Ciofu O (2010) Antibiotic resistance  
452 of bacterial biofilms. *International Journal of Antimicrobial Agents* 35(4):322–  
453 332.
- 454 11. Seidler MJ, Salvenmoser S, Muller FMC (2008) *Aspergillus fumigatus* Forms  
455 Biofilms with Reduced Antifungal Drug Susceptibility on Bronchial Epithelial  
456 Cells. *Antimicrobial Agents and Chemotherapy* 52(11):4130–4136.
- 457 12. Alhede M, Bjarnsholt T, Givskov M, Alhede M (2014) *Pseudomonas aeruginosa*  
458 biofilms: mechanisms of immune evasion. *Adv Appl Microbiol* 86:1–40.
- 459 13. Lee MJ, et al. (2015) The Fungal Exopolysaccharide Galactosaminogalactan  
460 Mediates Virulence by Enhancing Resistance to Neutrophil Extracellular Traps.  
461 *PLoS Pathog* 11(10):e1005187.
- 462 14. Fontaine T, et al. (2011) Galactosaminogalactan, a new immunosuppressive  
463 polysaccharide of *Aspergillus fumigatus*. *PLoS Pathog* 7(11):e1002372.
- 464 15. Lee MJ, et al. (2016) Deacetylation of Fungal Exopolysaccharide Mediates  
465 Adhesion and Biofilm Formation. *mBio* 7(2):e00252–16.
- 466 16. Franklin MJ, Nivens DE, Weadge JT, Howell PL (2011) Biosynthesis of the  
467 *Pseudomonas aeruginosa* Extracellular Polysaccharides, Alginate, Pel, and Psl.  
468 *Front Microbiol* 2:167.
- 469 17. Jennings LK, et al. (2015) Pel is a cationic exopolysaccharide that cross-links  
470 extracellular DNA in the *Pseudomonas aeruginosa* biofilm matrix. *Proc Natl Acad*  
471 *Sci USA* 112(36):11353–11358.
- 472 18. Colvin KM, et al. (2011) The Pel and Psl polysaccharides provide *Pseudomonas*  
473 *aeruginosa* structural redundancy within the biofilm matrix. *Environmental*  
474 *Microbiology* 14(8):1913–1928.

- 475 19. Pritt B, O'Brien L, Winn W (2007) Mucoid *Pseudomonas* in Cystic Fibrosis.  
476 *American Journal of Clinical Pathology* 128(1):32–34.
- 477 20. Gravelat FN, et al. (2013) *Aspergillus* galactosaminogalactan mediates adherence  
478 to host constituents and conceals hyphal  $\beta$ -glucan from the immune system. *PLoS*  
479 *Pathog* 9(8):e1003575.
- 480 21. Yang L, et al. (2012) Polysaccharides serve as scaffold of biofilms formed by  
481 mucoid *Pseudomonas aeruginosa*. *FEMS Immunology & Medical Microbiology*  
482 65(2):366–376.
- 483 22. Baker P, et al. (2016) Exopolysaccharide biosynthetic glycoside hydrolases can be  
484 utilized to disrupt and prevent *Pseudomonas aeruginosa* biofilms. *Science*  
485 *Advances* 2(5):e1501632.
- 486 23. Bamford NC, et al. (2015) Sph3 is a glycoside hydrolase required for the  
487 biosynthesis of galactosaminogalactan in *Aspergillus fumigatus*. *Journal of*  
488 *Biological Chemistry* 290(46):27438–27450.
- 489 24. Khan W, et al. (2010) Aminoglycoside resistance of *Pseudomonas aeruginosa*  
490 biofilms modulated by extracellular polysaccharide. *Int Microbiol* 13(4):207–212.
- 491 25. Colvin KM, et al. (2011) The Pel Polysaccharide Can Serve a Structural and  
492 Protective Role in the Biofilm Matrix of *Pseudomonas aeruginosa*. *PLoS Pathog*  
493 7(1):e1001264.
- 494 26. Rajendran R, et al. (2013) Extracellular DNA release acts as an antifungal  
495 resistance mechanism in mature *Aspergillus fumigatus* biofilms. *Eukaryotic Cell*  
496 12(3):420–429.
- 497 27. Rajendran R, et al. (2011) Azole Resistance of *Aspergillus fumigatus* Biofilms Is  
498 Partly Associated with Efflux Pump Activity. *Antimicrobial Agents and*  
499 *Chemotherapy* 55(5):2092–2097.
- 500 28. Mowat E, et al. (2008) Phase-dependent antifungal activity against *Aspergillus*  
501 *fumigatus* developing multicellular filamentous biofilms. *Journal of Antimicrobial*  
502 *Chemotherapy* 62(6):1281–1284.
- 503 29. Campoli P, et al. (2013) Pharmacokinetics of posaconazole within epithelial cells  
504 and fungi: insights into potential mechanisms of action during treatment and  
505 prophylaxis. *Journal of Infectious Diseases* 208(10):1717–1728.
- 506 30. Bezerra LML (2004) Interactions of *Aspergillus fumigatus* with endothelial cells:  
507 internalization, injury, and stimulation of tissue factor activity. *Blood*  
508 103(6):2143–2149.
- 509 31. Beauvais A, et al. (2007) An extracellular matrix glues together the aerial-grown  
510 hyphae of *Aspergillus fumigatus*. *Cellular Microbiology* 9(6):1588–1600.

- 511 32. Martins M, et al. (2009) Presence of Extracellular DNA in the *Candida albicans*  
512 Biofilm Matrix and its Contribution to Biofilms. *Mycopathologia* 169(5):323–331.
- 513 33. Krappmann S, Ramage G (2013) A sticky situation: extracellular DNA shapes  
514 *Aspergillus fumigatus* biofilms. *Front Microbiol* 4:159.
- 515 34. Fuxman Bass JI, et al. (2010) Extracellular DNA: A Major Proinflammatory  
516 Component of *Pseudomonas aeruginosa* Biofilms. *The Journal of Immunology*  
517 184(11):6386–6395.
- 518 35. Vilain S, Pretorius JM, Theron J, Brozel VS (2009) DNA as an Adhesin: *Bacillus*  
519 *cereus* Requires Extracellular DNA To Form Biofilms. *Applied and Environmental*  
520 *Microbiology* 75(9):2861–2868.
- 521 36. Martins M, Henriques M, Lopez-Ribot JL, Oliveira R (2011) Addition of DNase  
522 improves the in vitro activity of antifungal drugs against *Candida albicans*  
523 biofilms. *Mycoses* 55(1):80–85.
- 524 37. Chiang WC, et al. (2013) Extracellular DNA Shields against Aminoglycosides in  
525 *Pseudomonas aeruginosa* Biofilms. *Antimicrobial Agents and Chemotherapy*  
526 57(5):2352–2361.
- 527 38. Paugam A, et al. (2010) Characteristics and consequences of airway colonization  
528 by filamentous fungi in 201 adult patients with cystic fibrosis in France. *Med*  
529 *Mycol* 48 Suppl 1(O1):S32–S36.
- 530 39. Baxter CG, et al. (2013) Intravenous antibiotics reduce the presence of *Aspergillus*  
531 in adult cystic fibrosis sputum. *Thorax* 68(7):652–657.
- 532 40. Pierce CG, et al. (2008) A simple and reproducible 96-well plate-based method for  
533 the formation of fungal biofilms and its application to antifungal susceptibility  
534 testing. *Nat Protoc* 3(9):1494–1500.
- 535 41. Sheppard DC, et al. (2004) Novel inhalational murine model of invasive  
536 pulmonary aspergillosis. *Antimicrobial Agents and Chemotherapy* 48(5):1908–  
537 1911.
- 538 42. Brannon MK, et al. (2009) *Pseudomonas aeruginosa* Type III secretion system  
539 interacts with phagocytes to modulate systemic infection of zebrafish embryos.  
540 *Cellular Microbiology* 11(5):755–768.

#### 541 **Figure Legends:**

542 **Figure 1. Treatment with Sph3<sub>h</sub> disrupts *A. fumigatus* biofilms and degrades GAG**  
543 **on the surface of hyphae. (a)** Crystal violet staining of established *A. fumigatus* biofilms  
544 treated with the indicated concentration of each hydrolase. Each data point represents the  
545 mean of  $n = 20$  with error bars indicating standard error (SE). EC<sub>50</sub> indicates the 50%  
546 effective concentration  $\pm$  SE. **(b)** Effects of the indicated hydrolases on cell wall

associated GAG. Hyphae of the indicated strains grown in the absence of hydrolase treatment (left column) or following exposure to 0.5  $\mu$ M of the indicated hydrolases (right column). Cell wall-associated GAG was visualized using FITC-conjugated lectin staining (green) with DRAQ5 as a counterstain (red). Scale bars = 20  $\mu$ m. The GAG-deficient  $\Delta$ uge3 mutant was included as a negative control. (c) Quantification of lectin-staining from panel (b). Each data point represents the mean fluorescence intensity of at least 7 hyphae with error bars indicating SE. \* indicates a significant difference ( $p < 0.05$ ) relative to the untreated *A. fumigatus* as determined by one-way ANOVA with Dunnett's multiple comparison test. (d) Scanning electron micrographs of hyphae of the indicated strains grown in the absence of hydrolases (left & middle) and following exposure to 0.5  $\mu$ M of Sph3<sub>h</sub> (right column). Scale bars = 5  $\mu$ m.

**Figure 2. PelA<sub>h</sub> disrupts *A. fumigatus* biofilms and degrades GAG.** (a) Effects of PelA<sub>h</sub> on *A. fumigatus* biofilms. Crystal violet staining of established *A. fumigatus* biofilms treated with the indicated concentration of PelA<sub>h</sub> or PelA<sub>h</sub> E218A. Each data point represents the mean of  $n = 20$  with error bars indicating SE. EC<sub>50</sub> reported  $\pm$  SE. (b) Effects of the indicated hydrolases on cell wall-associated GAG. Established hyphae of the indicated strains were untreated (left column) or exposed to 0.5  $\mu$ M of the indicated hydrolases (right column). Cell wall-associated GAG was detected using FITC-conjugated lectin staining (green), with DRAQ5 as a counterstain (red). Scale bars = 20  $\mu$ m. (c) Mean fluorescent intensity of lectin staining in panel (b). Each data point represents the mean of at least 7 hyphae with error bars indicating SE. The \* indicates a significant difference ( $p < 0.05$ ) relative to the untreated *A. fumigatus* as determined by one-way ANOVA with Dunnett's multiple comparison test. (d) Scanning electron micrographs of hyphae of the indicated strains grown in the absence of hydrolase treatment (left & middle) or following treatment with 0.5  $\mu$ M of PelA<sub>h</sub> (right). Scale bars = 5  $\mu$ m.

**Figure 3. Sph3<sub>h</sub> binds Pel but is inactive against established *P. aeruginosa* biofilm.** (a) Established biofilms of RFP-producing *P. aeruginosa* overexpressing the Pel operon (red) were untreated (left) or exposed to 0.5  $\mu$ M of the indicated hydrolases (middle, right). Biofilm-associated Pel was detected using FITC-conjugated *Wisteria floribunda* lectin staining (green). Scale bars = 20  $\mu$ m. (b) Mean fluorescent intensity of lectin staining in panel (a). Each data point represents the mean of at least 4 *P. aeruginosa* colonies with error bars indicating SE. \* indicates a significant difference ( $p < 0.001$ ) relative to the untreated *P. aeruginosa* as determined by 1-way ANOVA with Dunnett's multiple comparison test. (c) Effects of Sph3<sub>h</sub> on Pel-mediated *P. aeruginosa* biofilms. Crystal violet staining of established biofilms of *P. aeruginosa* overexpressing the Pel operon incubated with the indicated concentrations of Sph3<sub>h</sub> or Sph3<sub>h</sub> D166A. Each data point represents the mean of  $n = 3$  with error bars indicating SE. EC<sub>50</sub> reported  $\pm$  SE. (d) Sph3<sub>h</sub> binding to Pel polysaccharide. Microtiter plates were coated with culture supernatants of the indicated *P. aeruginosa* strains and the binding of Sph3<sub>h</sub> was determined using an anti-Sph3<sub>h</sub> antibody. Each data point represents the mean of 3 independent experiments with error bars indicating SE.

**Figure 4. Glycoside hydrolases increase sensitivity of *A. fumigatus* to antifungal agents.** (a) Established biofilms of wild-type *A. fumigatus* strain Af293 were treated with



the indicated concentrations of antifungals with or without 0.5  $\mu$ M of the indicated hydrolase and the viability of the resulting biofilms was then measured using the XTT metabolic assay. Susceptibility to antifungals was quantified by determining the antifungal concentration resulting in a 50% reduction in fungal metabolic activity (MIC<sub>50</sub>) as compared to untreated controls. Bars represent the mean of at least  $n = 4$  with error bars indicating SE. **(b)** Effects of hydrolase therapy on antifungal uptake. *A. fumigatus* hyphae were treated with 1  $\mu$ M Sph3<sub>h</sub> then exposed to 2  $\mu$ g/ml BDP-PCZ. Uptake of BDP-PCZ was quantified via fluorometry. Each bar represents the mean of 3 independent experiments with error bars indicating SE. The \* indicates a significant difference ( $p < 0.05$ ) relative to untreated control samples as determined by 1-way ANOVA with Dunnett's multiple comparison test in (a), or two-tailed student's T-test in (b).

**Figure 5. Effects of hydrolases on *A. fumigatus*-induced airway epithelial cell damage and *in vivo* pulmonary infection.** **(a)** <sup>51</sup>Cr-loaded A549 pulmonary epithelial cells were incubated with conidia of wild-type *A. fumigatus* in the presence or absence of 0.5  $\mu$ M concentrations of the indicated hydrolases. Epithelial cell damage was determined by measurement of the amount of <sup>51</sup>Cr released into supernatant at the indicated time points. Each bar represents the mean of at least 3 (Untreated, Sph3<sub>h</sub>, Sph3<sub>h</sub> D166A) or 2 (PelA<sub>h</sub>, PelA<sub>h</sub> E218A) independent experiments performed in duplicate with error bars indicating SE. **(b)** Pulmonary injury as measured by lactose dehydrogenase activity of the bronchoalveolar lavage fluid from BALB/c mice treated intratracheally or not with the indicated quantities of Sph3<sub>h</sub> and sacrificed 7 days post treatment. Data represents the mean of at least  $n = 5$ , with error bars representing SE. **(c)** Fungal burden of neutropenic mice as determined by quantitative PCR following 4 days of infection with the indicated *A. fumigatus* strain with or without treatment with a single dose of 500  $\mu$ g Sph3<sub>h</sub>. Data represents the mean of at least  $n = 12$ , from two independent experiments with error bars indicating SE. The \* indicate a significant difference  $p < 0.01$  for (a) and (c), and  $< 0.05$  for (b), relative to untreated controls using a two-way ANOVA for (a) and a one-way ANOVA for (b) and (c) with a Dunnett's multiple comparison test. **(d)** Histopathological analysis of lung sections of mice from (c) stained with Periodic acid Schiff reagent. Arrow indicates hyphal lesion. Scale bars = 20  $\mu$ m.

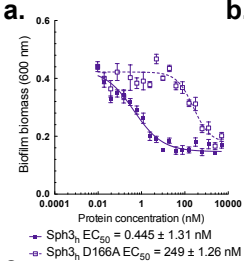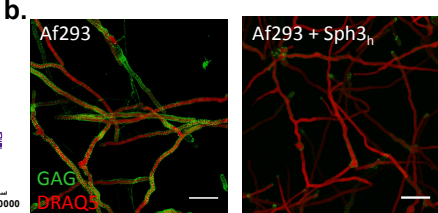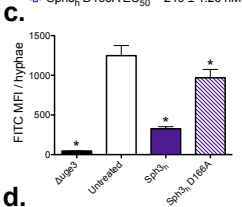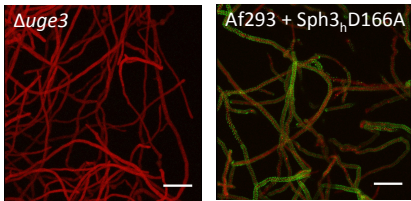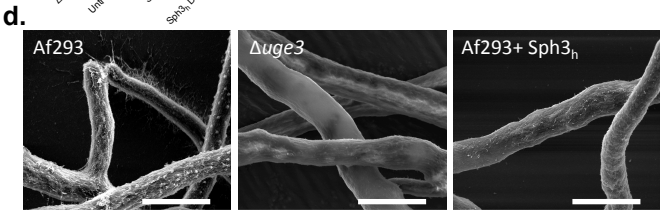

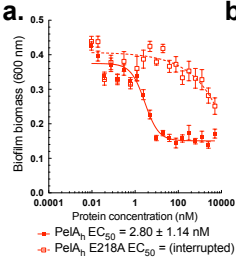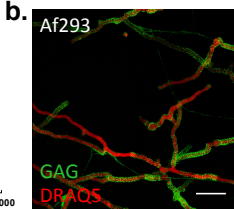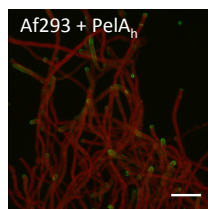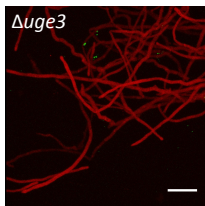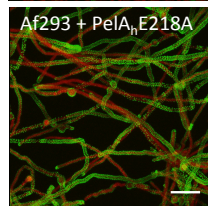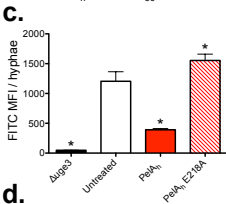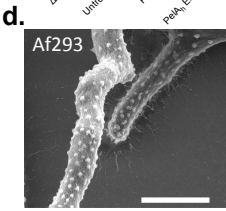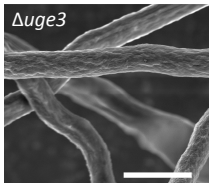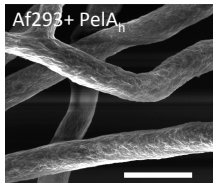

**a.**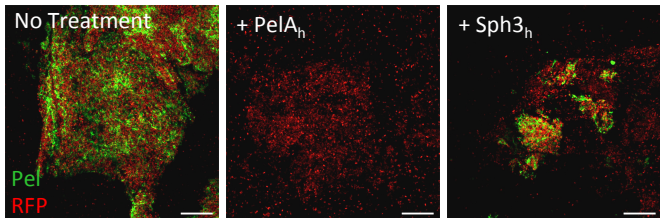**b.**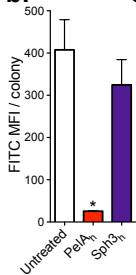**c.**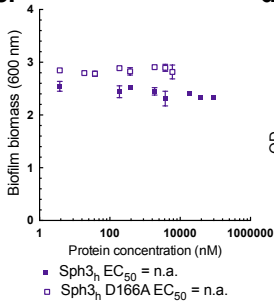**d.**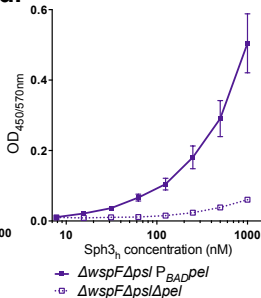

**a.**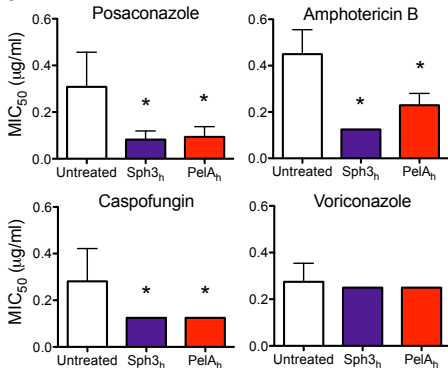**b.**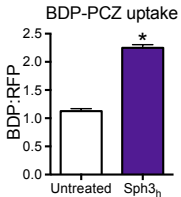



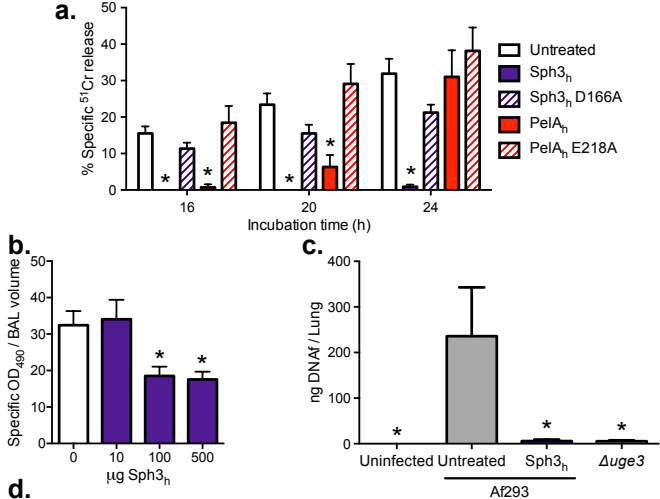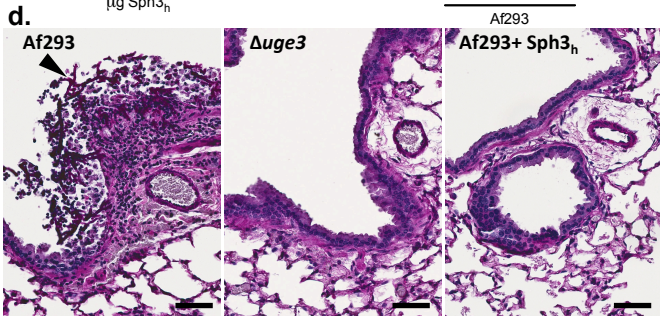

Source: https://www.biorxiv.org/content/10.1101/113696v1.full.pdf
